# Supplementary material for: The Metabolic Profile of Anchusa officinalis L. Differs According to Its Associated Arbuscular Mycorrhizal Fungi
Source: MDPI journal article supplement (doi:10.3390/metabo12070573), 2022-06-22
Supplement: s1 [file s1]

## Supplementary materials

# The metabolic profile of *Anchusa officinalis* L. differs according to its associated arbuscular mycorrhizal fungi

Evangelia Tsiokanos <sup>1†</sup>, Annalisa Cartabia <sup>2†</sup>, Nikolaos Tsafantakis <sup>1</sup>, Ismahen Lalaymia <sup>2</sup>, Aikaterini Termentzi <sup>3</sup>, Maria Miguel <sup>4</sup>, Stéphane Declerck <sup>2</sup>, Nikolas Fokialakis <sup>1\*</sup>

<sup>1</sup> Department of Pharmacy, Division of Pharmacognosy and Natural Product Chemistry, National and Kapodistrian University of Athens, 15771 Athens, Greece; evatsiokanos@pharm.uoa.gr (E.T.);

ntsafantakis@pharm.uoa.gr (N.T.), fokialakis@pharm.uoa.gr (N.F.)

<sup>2</sup> Applied Microbiology, Mycology, Earth and Life Institute, Université catholique de Louvain-la-Neuve, 1348 Belgium; annalisa.cartabia@uclouvain.be (A.C.); ismahen.lalaymia@uclouvain.be (I.L.); stephan.declerck@uclouvain.be (S.D.)

<sup>3</sup> Laboratory of Pesticides' Toxicology, Benaki Phytopathological Institute, 8 St. Delta Street Kifissia, 14561 Athens, Greece; a.termentzi@bpi.gr

<sup>4</sup> Instituto de Tecnologia Química e Biológica António Xavier, Universidade Nova de Lisboa (ITQB NOVA), Oeiras, Portugal; [pmariamiguel@gmail.com](mailto:pmariamiguel@gmail.com) (M.M.)

\* Correspondence: fokialakis@pharm.uoa.gr; Tel.: +30-2107274524

† These authors contributed equally to this work.

**Supplementary Figure S1.** Principal component analysis (PCA) – Comparison of UHPLC-HRMS metabolic profiles from *A. officinalis* root (A) and shoot (B) samples associated with four different AMF species after 9 days of growth in the semi-hydroponic cultivation system (*R. irregularis* MUCL 41833: blue dots; *R. intraradices* MUCL 49410: green dots; *R. clarus* MUCL 46238-M<sup>clarus</sup>: red dots).

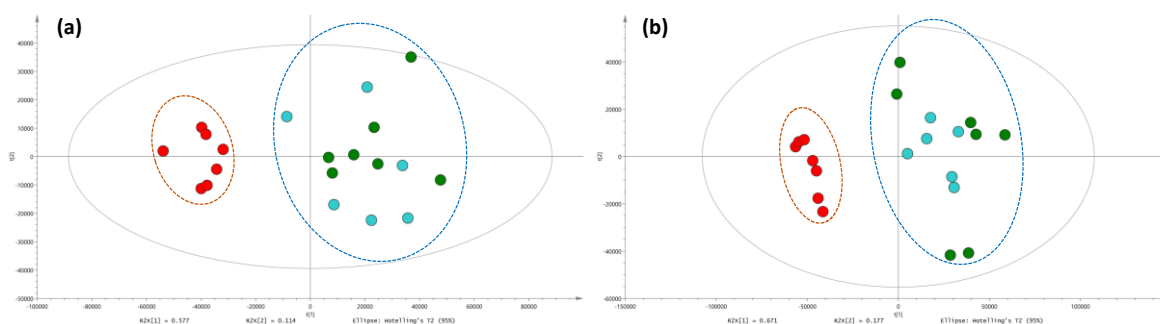

**Supplementary Figure S2.** Principal component analysis (PCA) – Comparison of UHPLC-HRMS metabolic profiles from *A. officinalis* root (a) and shoot (b) samples associated with four different AMF species after 9 days of growth in the semi-hydroponic cultivation system (*R. irregularis* MUCL 41833: blue dots; *R. intraradices* MUCL 49410: green dots; *R. aggregatus* MUCL 49408: yellow dots).

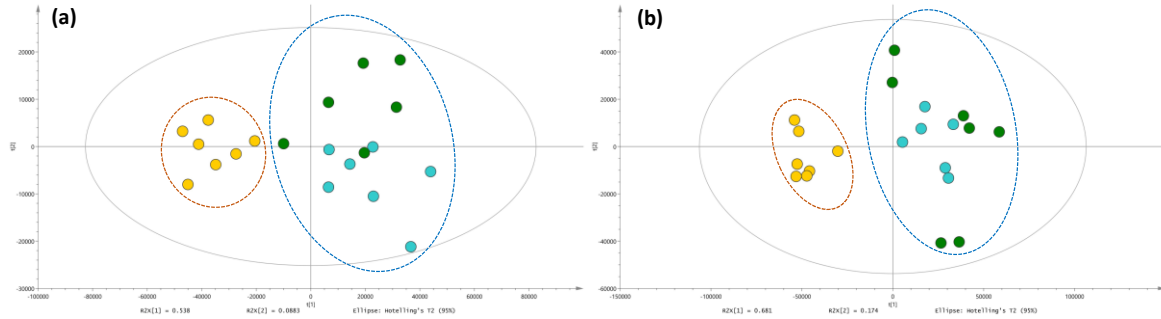

**Supplementary Figure S3.** Principal component analysis (PCA) – Comparison of UHPLC-HRMS metabolic profiles from *A. officinalis* root (a) and shoot (b) samples associated with four different AMF species after 9 days of growth in the semi-hydroponic cultivation system (*R. intraradices* MUCL 49410-M<sup>intra</sup>: green dots; *R. clarus* MUCL 46238-M<sup>clarus</sup>: red dots; *R. aggregatus* MUCL 49408-M<sup>aggreg</sup>: yellow dots).

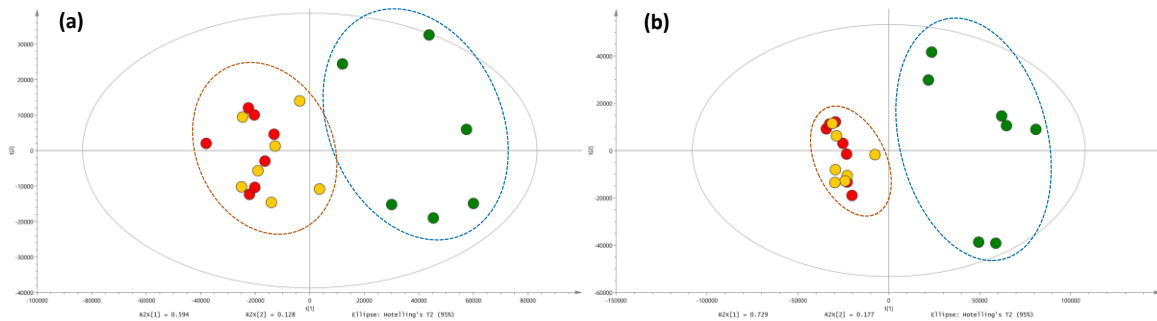

**Supplementary Figure S4.** Partial least square analysis – Discriminant analysis (PLS-DA) and permutation test (100 rearrangements) – Comparison of UHPLC-HRMS metabolic profiles from *A. officinalis* root (a) and shoot (b) samples associated with four different AMF species after 9 days of growth in the S-H cultivation system (*R. irregularis* MUCL 41833: blue dots; *R. intraradices* MUCL 49410: green dots).

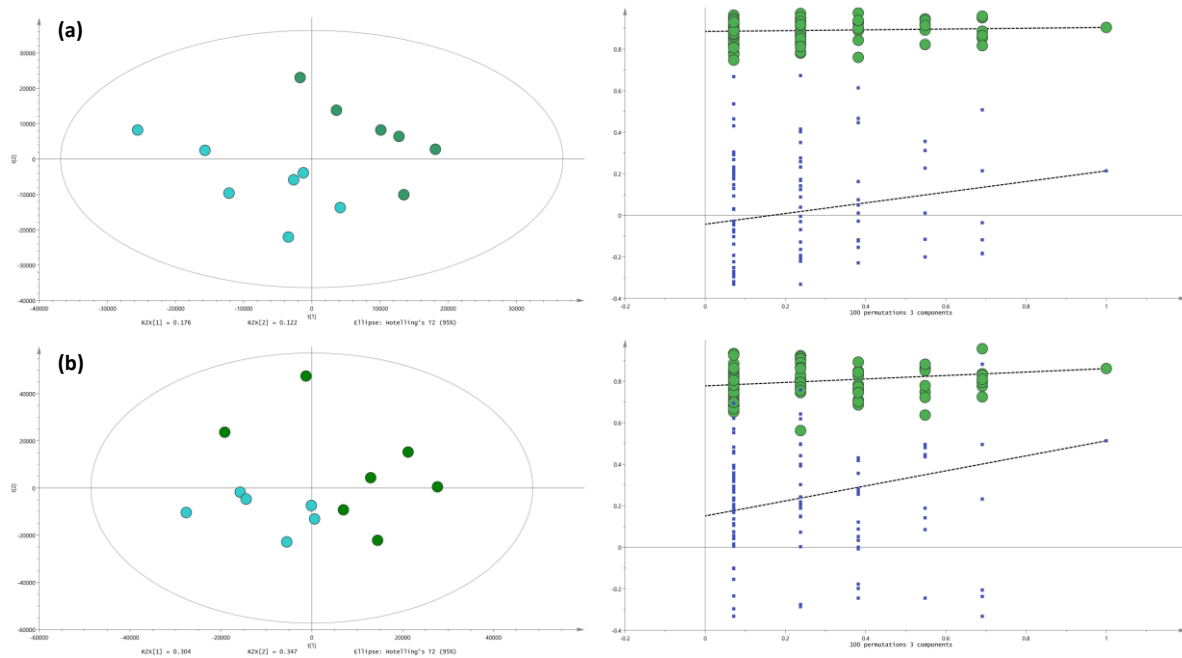

**Supplementary Figure S5.** Partial least square analysis – Discriminant analysis (PLS-DA) and permutation test (100 rearrangements) – Comparison of UHPLC-HRMS metabolic profiles from *A. officinalis* root (a) and shoot (b) samples associated with four different AMF species after 9 days of growth in the semi-hydroponic cultivation system (*R. clarus* MUCL 46238: red dots; *R. aggregatus* MUCL 49408: yellow dots).

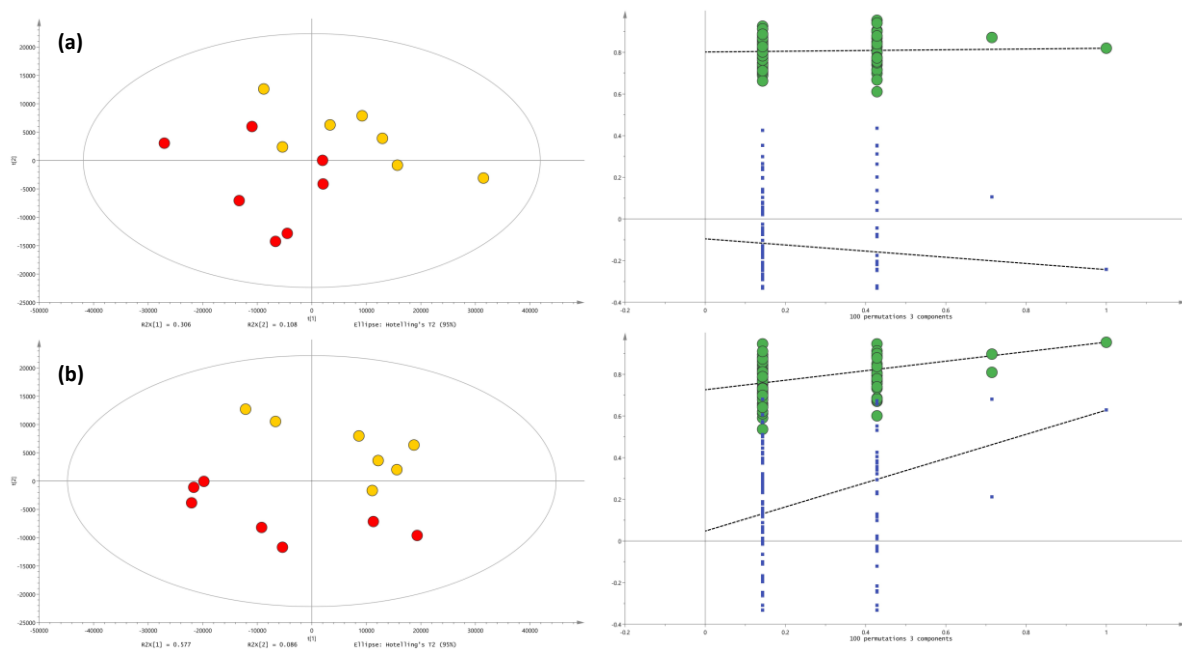

**Supplementary Figure S6.** Partial least square analysis – Discriminant analysis (PLS-DA) and permutation test (100 rearrangements) – Comparison of UHPLC-HRMS metabolic profiles from *A. officinalis* root (a) and shoot (b) samples associated with four different AMF species after 9 days of growth in the semi-hydroponic cultivation system (*R. irregularis* MUCL 41833: blue dots; *R. aggregatus* MUCL 46238: yellow dots).

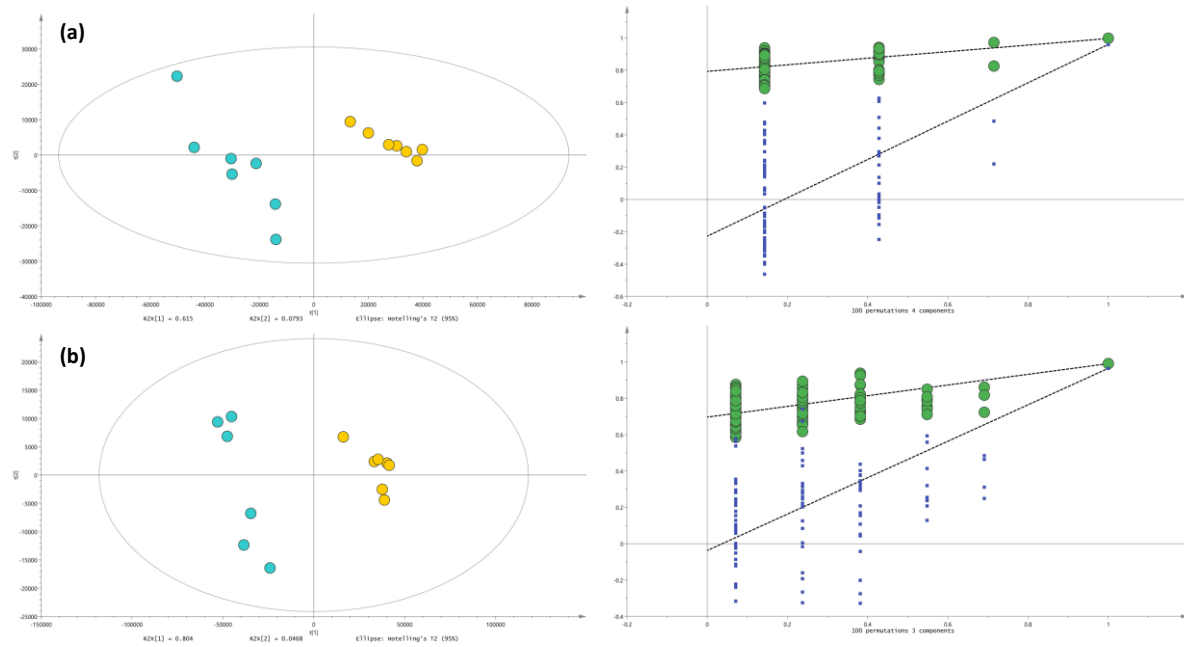

**Supplementary Figure S7.** Partial least square analysis – Discriminant analysis (PLS-DA) and permutation test (100 rearrangements) – Comparison of UHPLC-HRMS metabolic profiles from *A. officinalis* root (a) and shoot (b) samples associated with four different AMF species after 9 days of growth in the semi-hydroponic cultivation system (*R. intraradices* MUCL 49410: green dots; *R. clarus* MUCL 4623: red dots).

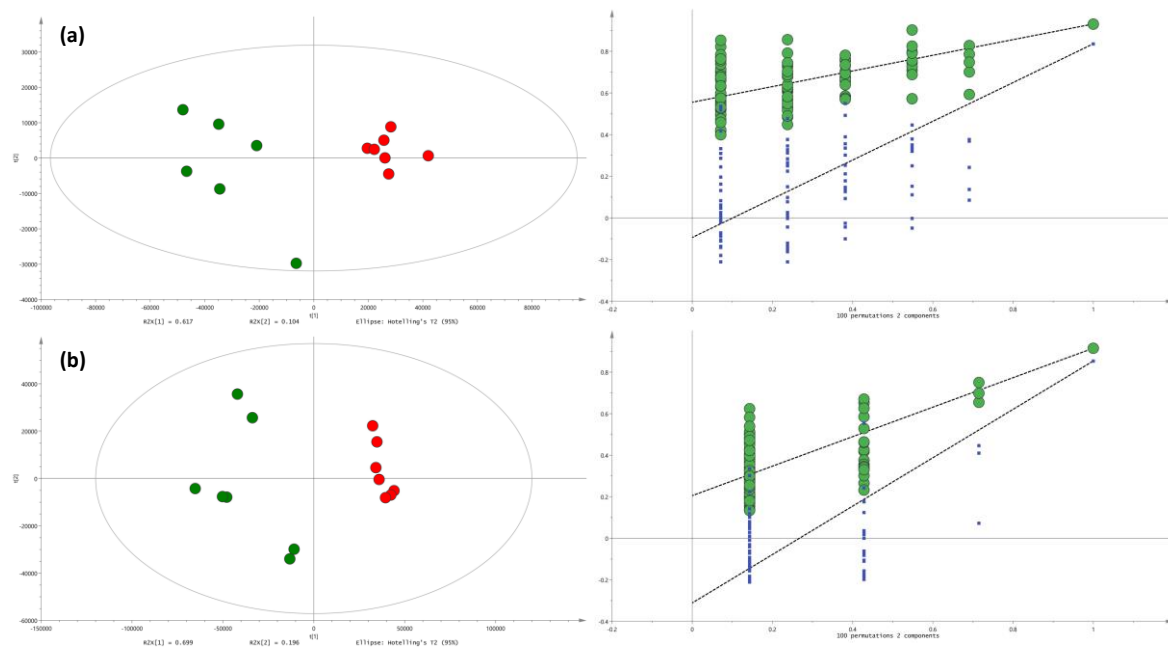

**Supplementary Table S1.** Evolution of AMF-root colonization and total fresh weight (TFW) of *A. officinalis* associated to one AMF species (*R. irregularis* MUCL 41833 –M<sup>irreg</sup>, *R. intraradices* MUCL 49410 –M<sup>intra</sup>, *R. clarus* MUCL 46238 –M<sup>clarus</sup> and *R. aggregatus* MUCL 49408 –M<sup>aggreg</sup>) before (T0) and after 9 days (T1) of growth in the S-H cultivation system.

| AMF treatments                 | Harvest time | AMF-root colonization (%) |        | Fresh weight (g) |
|--------------------------------|--------------|---------------------------|--------|------------------|
|                                |              | TC                        | AC     | TFW              |
| MUCL 41833-M <sup>irreg</sup>  | T0           | 76 ± 3                    | 14 ± 3 | 5.74 ± 1.5       |
| MUCL 49410-M <sup>intra</sup>  | T0           | 91 ± 3                    | 22 ± 3 | 7.78 ± 1.5       |
| MUCL 46238-M <sup>clarus</sup> | T0           | 86 ± 3                    | 18 ± 3 | 4.95 ± 1.5       |
| MUCL 49408-M <sup>aggreg</sup> | T0           | 85 ± 3                    | 17 ± 3 | 7.73 ± 1.5       |
| MUCL 41833-M <sup>irreg</sup>  | T1           | 63 ± 3                    | 6 ± 3  | 5.63 ± 1.5       |
| MUCL 49410-M <sup>intra</sup>  | T1           | 70 ± 3                    | 12 ± 3 | 8.66 ± 1.5       |
| MUCL 46238-M <sup>clarus</sup> | T1           | 61 ± 3                    | 6 ± 3  | 5.31 ± 1.5       |
| MUCL 49408-M <sup>aggreg</sup> | T1           | 68 ± 3                    | 10 ± 3 | 8.39 ± 1.5       |

The parameters measured are expressed as mean ± standard errors (SE) of 7 (T0) and 7 (T1) replicates per each AMF treatment.
